# Supplementary material
Source: PubMed Central journal article supplement (PMC4248405)

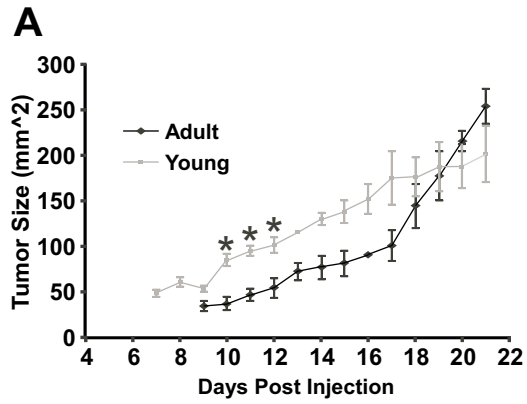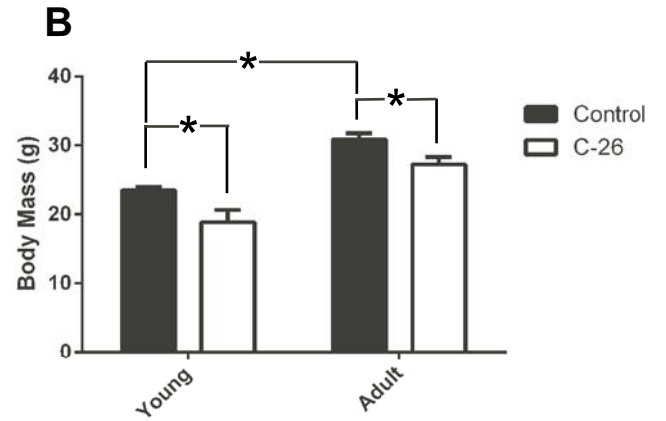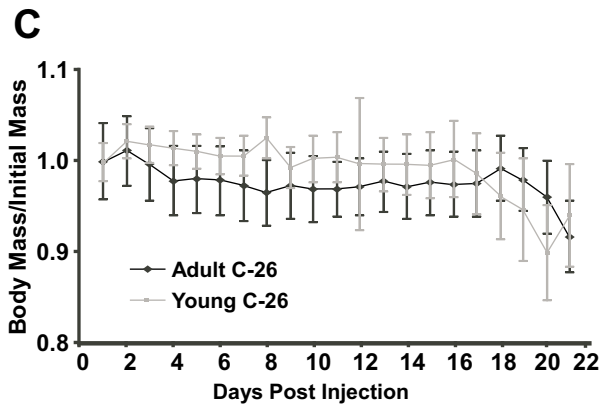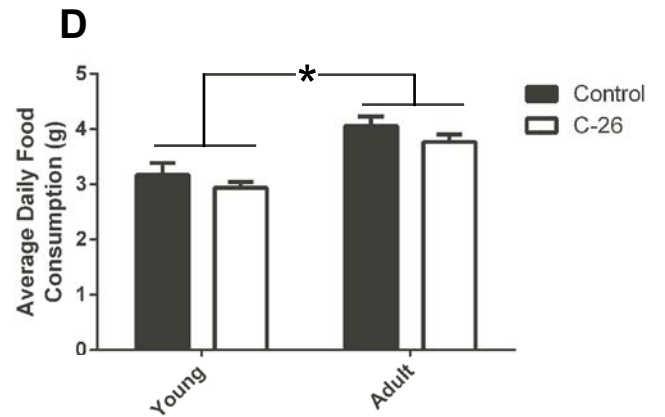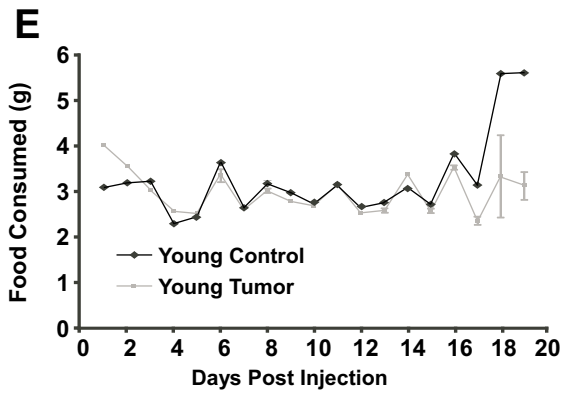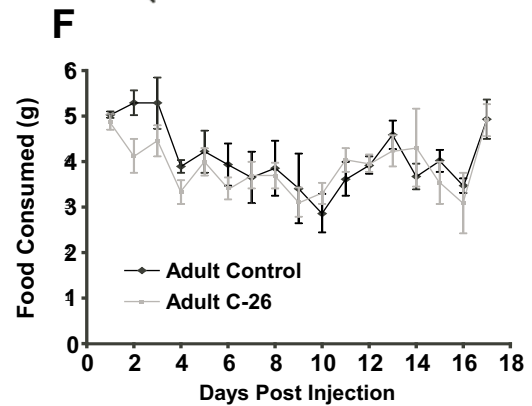

Supplement: 13539_2014_141_MOESM1_ESM.pdf [file 13539_2014_141_MOESM1_ESM.pdf]

**Supplementary Figure 3**  
Talbert et al

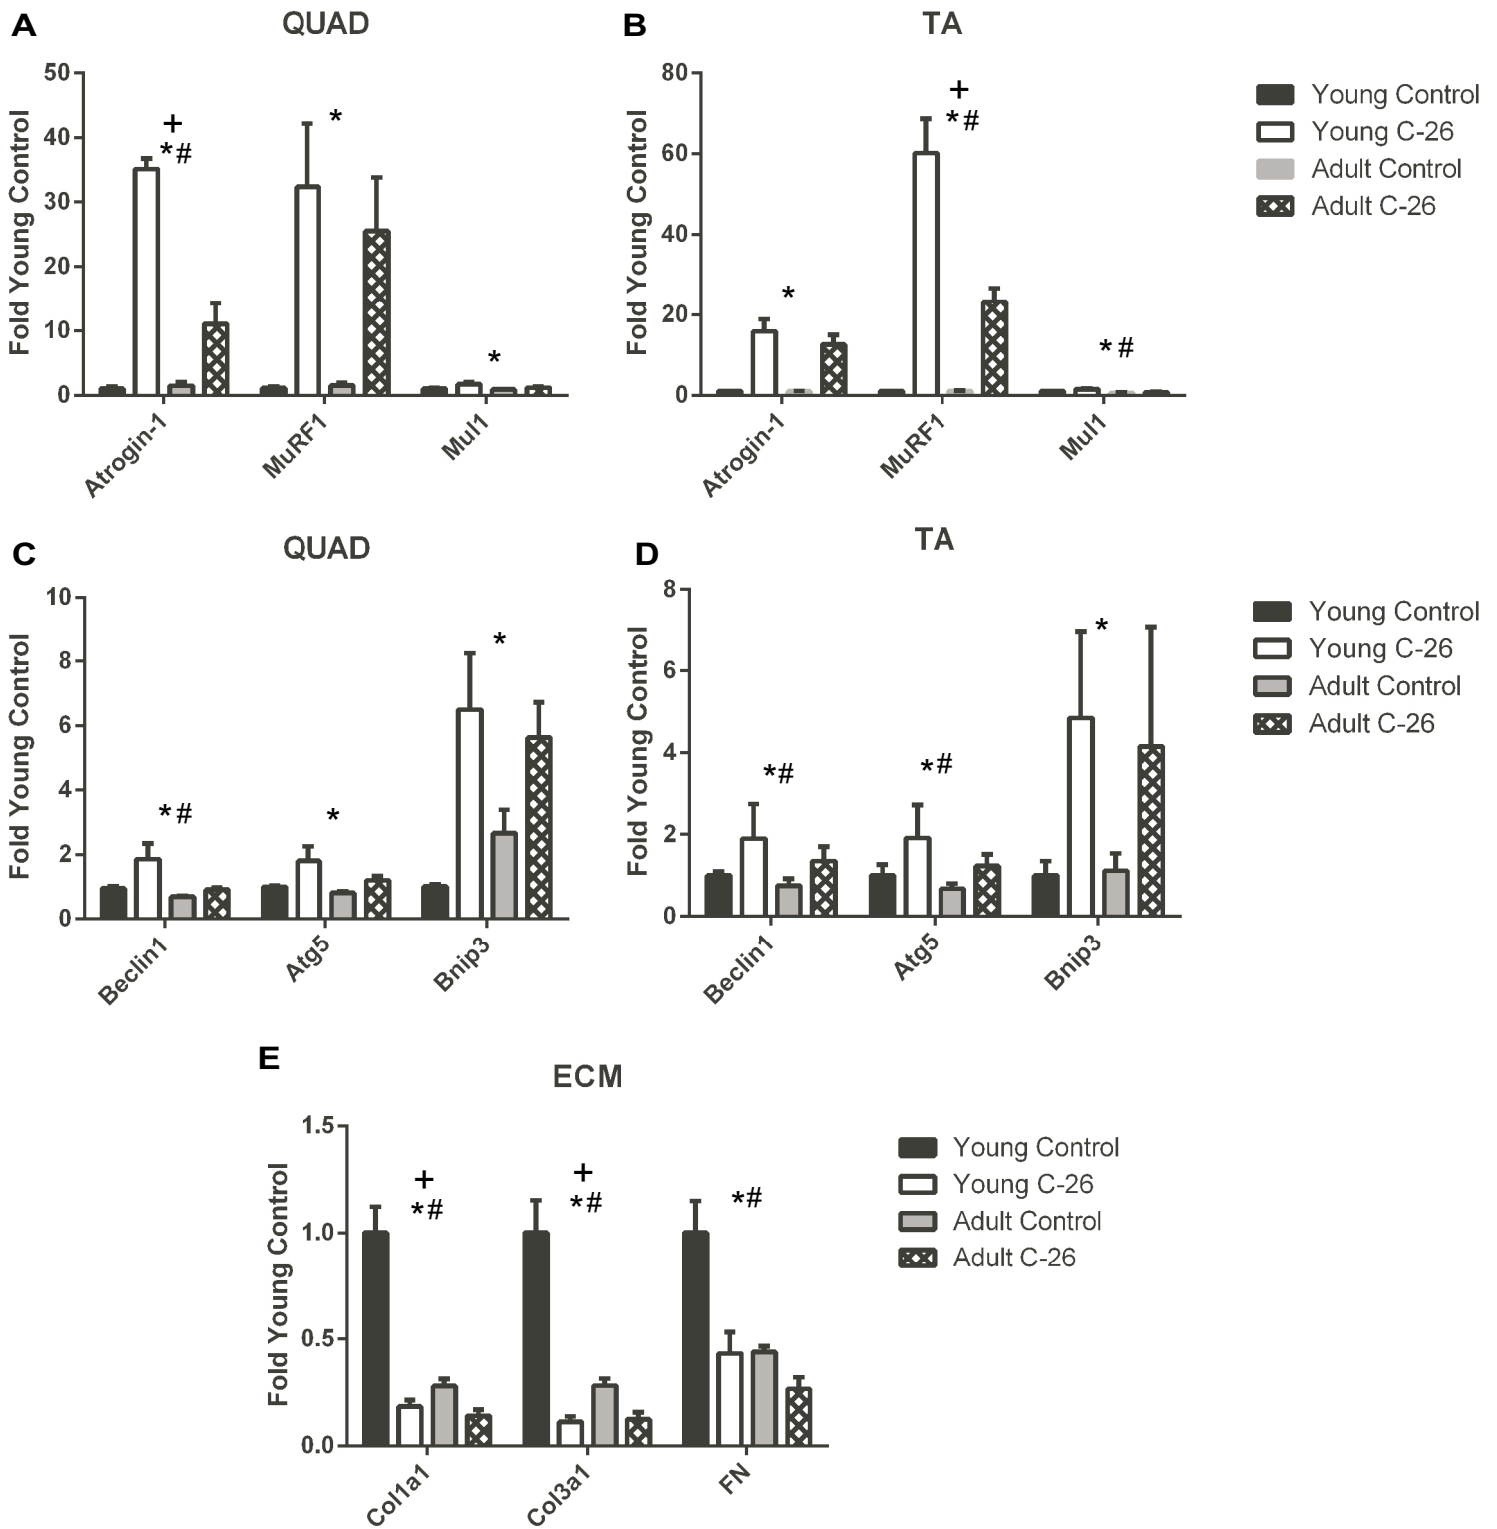

Supplement: 13539_2014_141_MOESM3_ESM.pdf [file 13539_2014_141_MOESM3_ESM.pdf]
